# Supplementary material for: PKCβII acts downstream of chemoattractant receptors and mTORC2 to regulate cAMP production and myosin II activity in neutrophils
Source: PubMed Central journal article supplement — Mol Biol Cell. 2014 May 1;25(9):1446–57. doi: 10.1091/mbc.E14-01-0037 (PMC4004594; doi:10.1091/mbc.e14-01-0037), 2014-05-01

# Supplemental Materials

*Molecular Biology of the Cell*

Liu et al.

# PKC $\beta$ II ACTS DOWNSTREAM OF CHEMOATTRACTANT RECEPTORS AND mTORC2 TO REGULATE cAMP PRODUCTION AND MYOSIN II ACTIVITY IN NEUTROPHILS

Liu, Gritz and Parent

## 1. SUPPLEMENTAL FIGURE LEGENDS

### Figure S1. PKC $\beta$ II is required for fMLP-induced cAMP accumulation and chemotaxis

(A) Expression of PKC $\alpha$  and PKC $\beta$ II is increased during PLB-985 differentiation into neutrophil-like cells. PLB-985 cells were differentiated by treatment with 1.3% DMSO for 6 days. At different days, cells were lysed and equivalent amounts of cell lysates were subjected to Western blot analysis using PKC $\alpha$ , PKC $\beta$ II and GAPDH antibodies. Results are representative of three independent experiments.

(B) PKC $\alpha$  and PKC $\beta$ II KD in PLB-985 cells. Cells were lysed and equivalent amounts of cell lysates were subjected to Western blot analysis using PKC $\alpha$ , PKC $\beta$ II and GAPDH antibodies. Results are representative of three independent experiments.

(C) PKC $\beta$ II KD inhibits fMLP-induced cAMP production. Differentiated cells were stimulated with 1  $\mu$ M fMLP for 30 secs and intracellular cAMP levels were measured before and after chemoattractant addition. Average  $\pm$  SD values are presented from six independent experiments. \* $p < 0.01$  compared to the fMLP-stimulated WT group.

(D) Chemotaxis of PKC $\beta$ II KD cells to a point source of fMLP. To ensure that the micropipette was properly generating a chemical gradient, WT (gray) and shRNA (green) cells were mixed and exposed to a micropipette containing 1  $\mu$ M fMLP. Frames were captured every 10 secs. Representative images at the designated time are shown. The star represents the position of the tip of the micropipette. Overlay of bright field and fluorescent images representative of three independent experiments are presented.

(E) PKC $\beta$ II shRNA cells show defects in RhoA-GTP activation. Differentiated cells were plated on fibronectin-coated plates for 10 min and uniformly stimulated with 1  $\mu$ M fMLP. At specific time points, RhoA-GTP was pulled down and detected using RhoA antibody. Results are representative of three independent experiments.

(F) PKC $\beta$ II shRNA and Rictor shRNA cells show higher P-MLC levels. Differentiated cells were treated as in (E). At specific time points, cells were lysed and equivalent amounts of cell lysates were subjected to Western blot analysis using P-MLC and GAPDH antibodies. Results are representative of three independent experiments.

(G) PKC $\beta$ II shRNA cells show higher P-MLC levels. Differentiated cells were treated as in (E). At specific time points, cells were lysed and equivalent amounts of cell lysates

were subjected to Western blot analysis using P-MLC and GAPDH antibodies. Results are representative of three independent experiments.

**Figure S2. PKC $\beta$ II overexpression inhibits fMLP-induced cAMP accumulation and chemotaxis**

(A) Expression of PKC $\alpha$  and PKC $\beta$ II do not change in response to chemoattractant addition in the presence of cycloheximide. Differentiated cells were pretreated with cycloheximide for 1 hr and stimulated with 1  $\mu$ M fMLP. At the different time point, cells were lysed and equivalent amounts of cell lysates were subjected to Western blot analysis using PKC $\alpha$ , PKC $\beta$ II and GAPDH antibodies. Results are representative of three independent experiments.

(B) Overexpression of PKC $\beta$ II inhibits chemoattractant-induced PKC activation. Differentiated cells were stimulated with 1  $\mu$ M fMLP for 20 secs and PKC activity was measured before and after chemoattractant addition. Mean  $\pm$  SD values are presented from four independent experiments. \* $p < 0.01$  compared to the fMLP-stimulated Venus group.

(C) Overexpression of PKC $\beta$ II inhibits chemoattractant-induced cAMP production. Differentiated cells were stimulated with 1  $\mu$ M fMLP for 30 secs and intracellular cAMP levels were measured before and after chemoattractant addition. Mean  $\pm$  SD values are presented from four independent experiments. # $p < 0.05$  compared to the fMLP-stimulated WT group.

(D) PKC $\beta$ II Venus cells have a lower Chemotaxis Index. The CI of cells during the first 5 min and from 5-20 min was quantified from EZ-TAXIScan recordings. The graph represents mean  $\pm$  SD from six independent experiments. \* $p < 0.01$  compared to the Venus group.

(E) PKC $\beta$ II Venus cells have decreased migration speed. Migration speed of cells during the first 5 min and from 5-20 min was quantified from EZ-TAXIScan recordings. The graph represents mean  $\pm$  SD from six independent experiments. \* $p < 0.01$  compared to the Venus group.

**Figure S3. The cytosol-to-membrane translocation of PKC $\beta$ II is dependent on mTORC2-mediated TM site phosphorylation**

(A) PKC $\beta$ II activity is required for its cytosol-to-membrane translocation. Human blood primary neutrophils were treated with or without 10  $\mu$ M GO6976 for 30 min. Cells were uniformly stimulated with 1  $\mu$ M fMLP. At specific time points, membrane and cytosol fractions were isolated and subjected to Western blot analysis using PKC $\alpha$ , PKC $\beta$ II and GAPDH antibodies. A representative blot of three independent experiments is shown.

(B) The cytosol-to-membrane translocation of PKC $\beta$ II is independent of actin polymerization. Human blood primary neutrophils were treated with or without 10  $\mu$ M

Latrunculin A for 30 min. Cells were uniformly stimulated with 1  $\mu$ M fMLP. At specific time points, membrane and cytosol fractions were isolated and subjected to Western blot analysis using PKC $\beta$ II and GAPDH antibodies. A representative blot of three independent experiments is shown.

(C) The cytosol-to-membrane translocation of PKC $\beta$ II is dependent on DAG and Ca<sup>++</sup>. Human blood primary neutrophils were treated with or without 2 mM EGTA or 10  $\mu$ M U73122 for 30 min. Cells were uniformly stimulated with 1  $\mu$ M fMLP. At specific time points, membrane and cytosol fractions were isolated and subjected to Western blot analysis using PKC $\beta$ II and GAPDH antibodies. A representative blot of three independent experiments is shown.

(D) The cytosol-membrane trafficking of PKC $\beta$ II is independent on PI3K. Human blood primary neutrophils were treated with or without 30  $\mu$ M LY294002 for 30 min. Cells were uniformly stimulated with 1  $\mu$ M fMLP. At specific time points, membrane and cytosol fractions were isolated and subjected to Western blot analysis using P-Akt, PKC $\beta$ II and GAPDH antibodies. A representative blot of three independent experiments is shown.

(E) WT, HM, TM and HM+TM mutants of PKC $\beta$ II Venus were expressed at comparable levels in differentiated cells. Differentiated cells were lysed and subjected to Western blot analysis using antibody against GFP and PKC $\beta$ II antibodies. A representative blot of three independent experiments is shown.

#### **Figure S4. fMLP induces the phosphorylation of PKC $\beta$ II on its TM and HM sites**

(A) Chemoattractant-induced HM phosphorylation of PKC $\beta$ II. Human blood primary neutrophils were uniformly stimulated with 1  $\mu$ M fMLP. At specific time points, cell lysates were subjected to Western blot analysis using an antibody against P-PKC $\alpha$  (S657), PKC $\alpha$ , P-PKC $\beta$ II (S660) and PKC $\beta$ II. Quantification of three experiments is presented as the amount of P-PKC after fMLP stimulation relative to that of unstimulated cells (mean  $\pm$  SD). \* $p$  < 0.01, compared to unstimulated cells.

(B) HM phosphorylation of PKC $\beta$ II is dependent on mTORC2. Differentiated NS shRNA and Rictor shRNA cells were stimulated with 1  $\mu$ M fMLP. At specific time points, cells were lysed and subjected to Western blot analysis using P-PKC $\alpha$  (S657), PKC $\alpha$ , P-PKC $\beta$ II (S660) and PKC $\beta$ II antibodies. Quantification of three experiments is presented as the amount of P-PKC $\alpha$  or P-PKC $\beta$ II after fMLP stimulation relative to that of unstimulated cells (mean  $\pm$  SD). \* $p$  < 0.01, compared to unstimulated cells.

(C) TM phosphorylation of PKC $\beta$ II in PKC $\alpha$  shRNA cells. Differentiated PKC $\alpha$  shRNA cells were stimulated with 1  $\mu$ M fMLP. At specific time points, cells were lysed and subjected to Western blot analysis using P-PKC $\alpha/\beta$ II (638/641) and GAPDH antibodies. A representative blot of three independent experiments is shown.

## 2. SUPPLEMENTAL MOVIE LEGENDS

**Movie S1.** EZ-Taxiscan chemotaxis of primary neutrophils in a gradient of fMLP in the presence or absence of 10  $\mu$ M GO6976 or 5  $\mu$ M CGP53353. Images were taken every 15 secs.

**Movie S2.** EZ-Taxiscan chemotaxis of differentiated NS shRNA, PKC $\alpha$  shRNA, and PKC $\beta$ II shRNA cells in a gradient of fMLP. Images were taken every 15 secs.

**Movie S3.** Differentiated WT (bright field) and NS shRNA (fluorescent) cells were subjected to a micropipette filled with 1  $\mu$ M fMLP and allowed to migrate directionally. Images were taken every 10 secs.

**Movie S4.** Differentiated WT (bright field) and PKC $\alpha$  shRNA (fluorescent) cells were subjected to a micropipette filled with 1  $\mu$ M fMLP and allowed to migrate directionally. Images were taken every 10 secs.

**Movie S5.** Differentiated WT (bright field) and PKC $\beta$ II shRNA (fluorescent) cells were subjected to a micropipette filled with 1  $\mu$ M fMLP and allowed to migrate directionally. Images were taken every 10 secs.

**Movie S6.** EZ-Taxiscan chemotaxis of differentiated Venus, PKC $\alpha$  Venus, and PKC $\beta$ II Venus cells in a gradient of fMLP. Images were taken every 15 secs.

**Movies S7.** Differentiated PKC $\alpha$  Venus cells were uniformly stimulated with 1  $\mu$ M fMLP. Images were taken every 10 secs.

**Movies S8.** Differentiated PKC $\beta$ II Venus cells were uniformly stimulated with 1  $\mu$ M fMLP. Images were taken every 10 secs.

# Figure S1

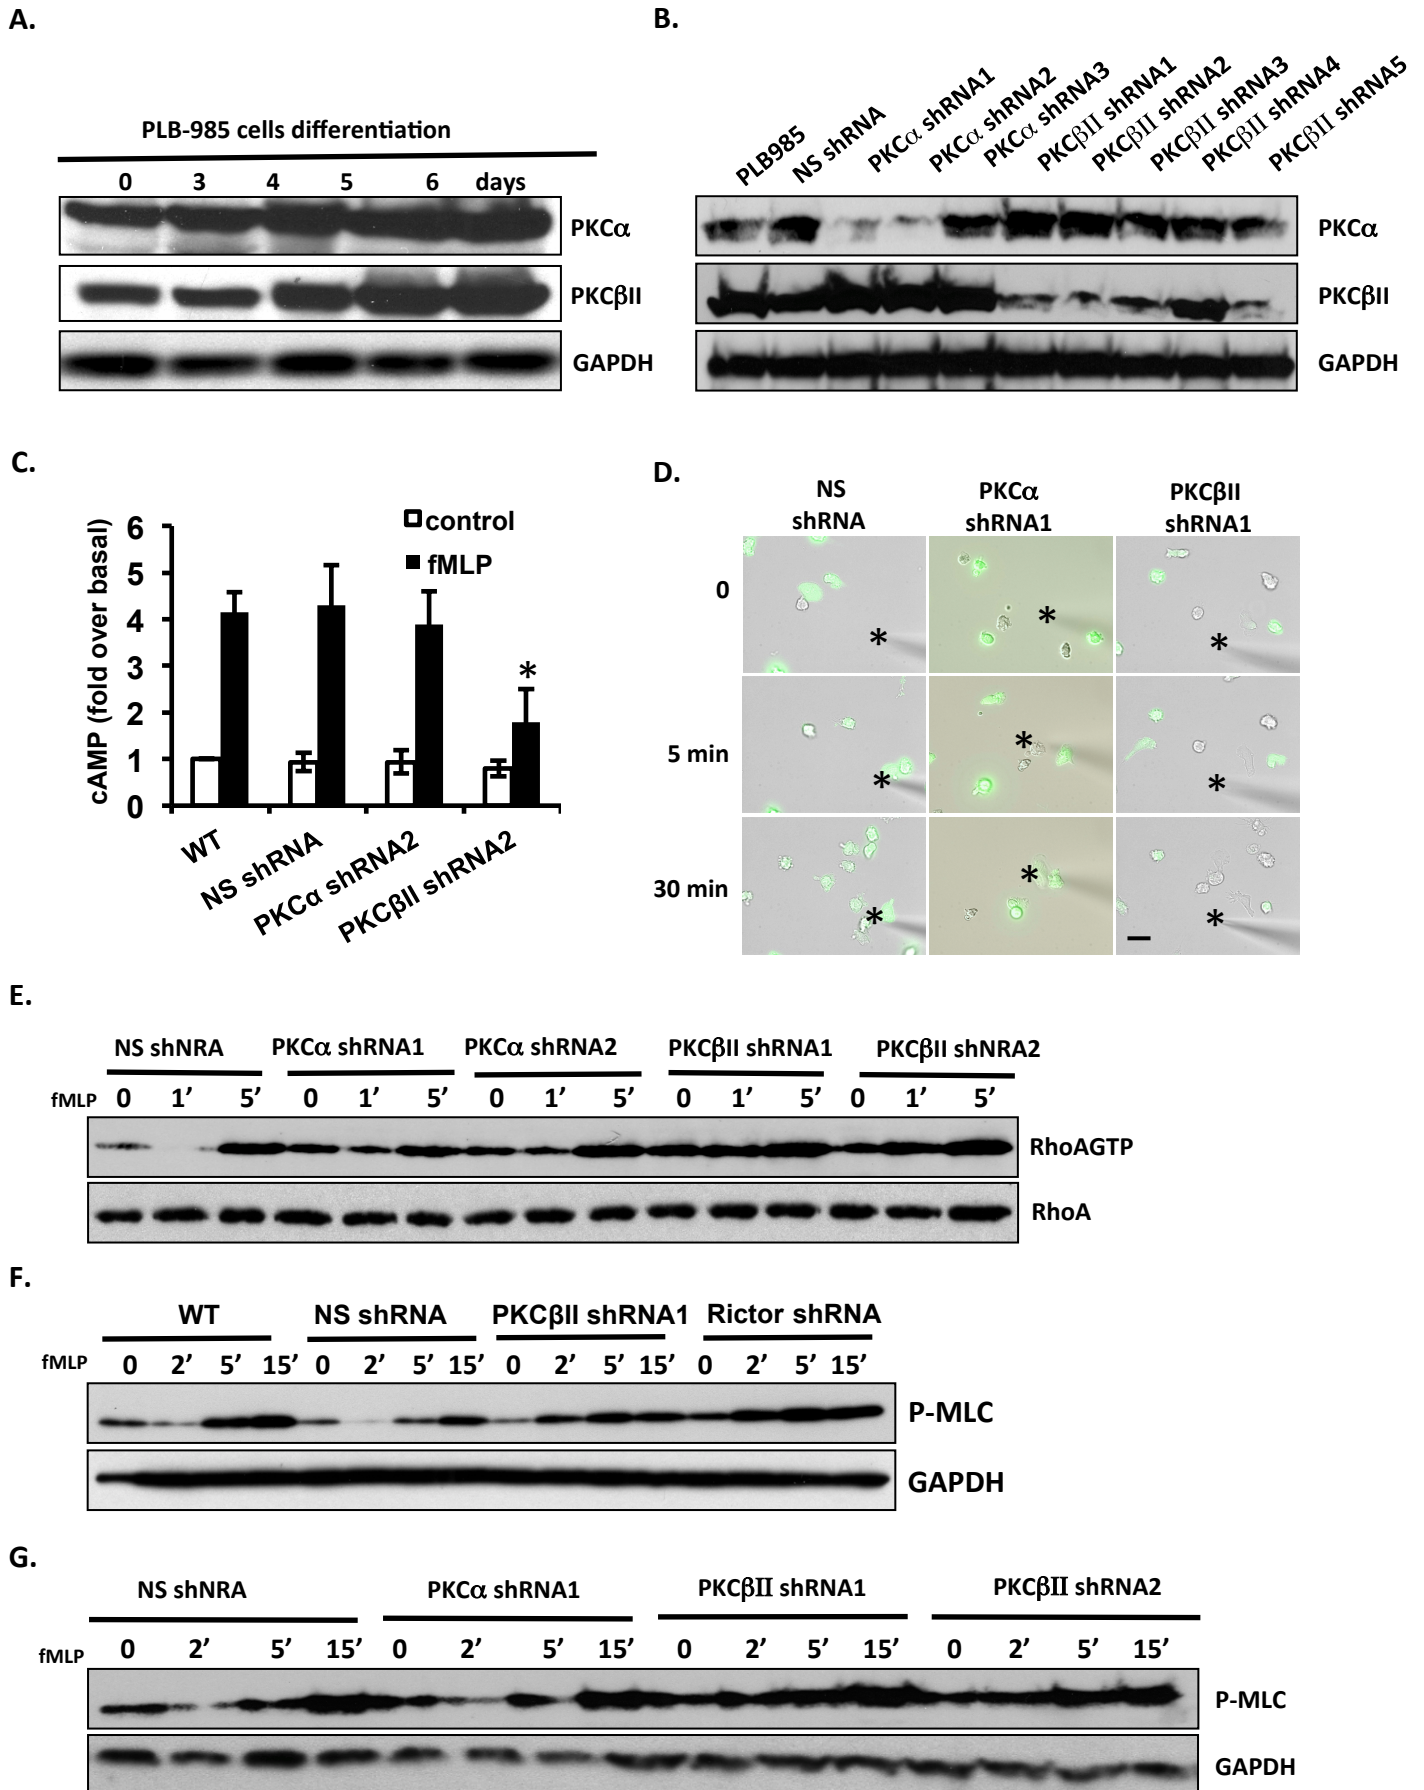

**Figure S2**

**A.**

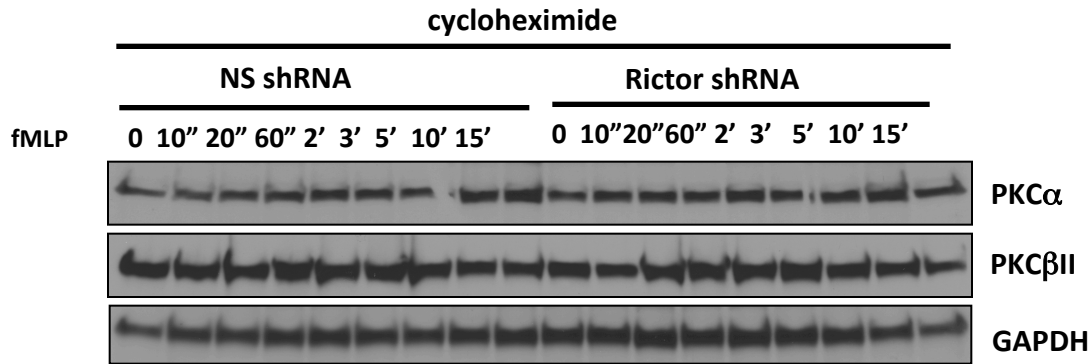

**B.**

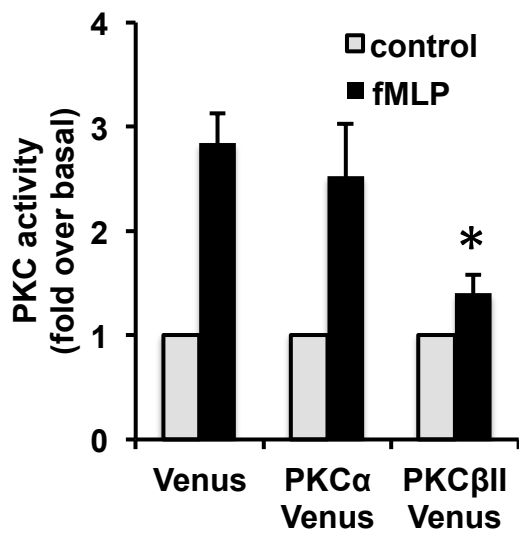

**C.**

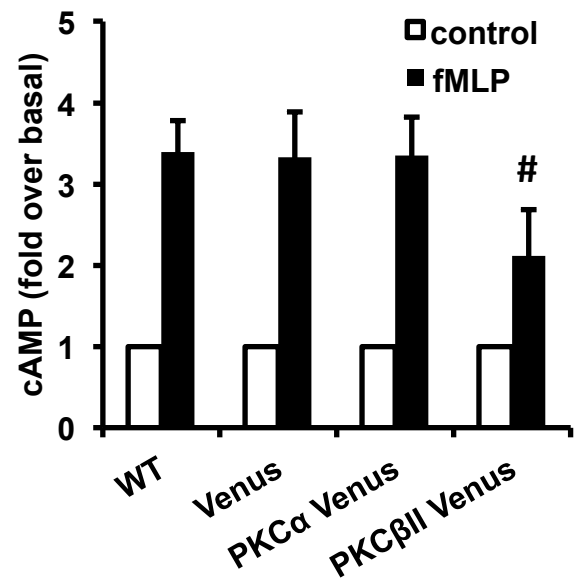

**D.**

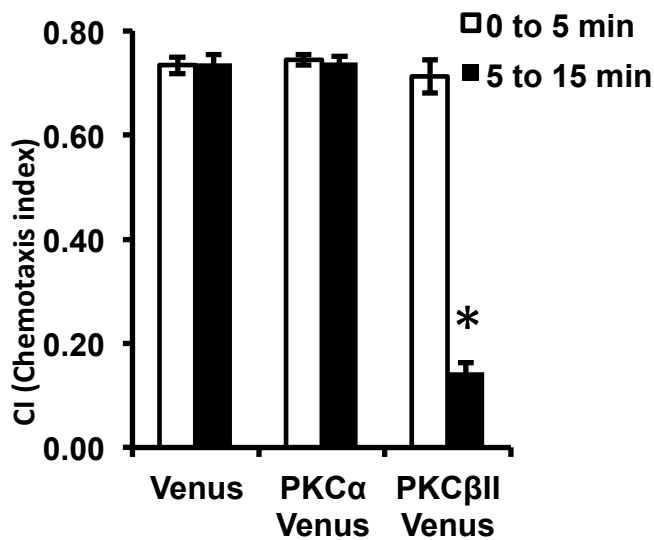

**E.**

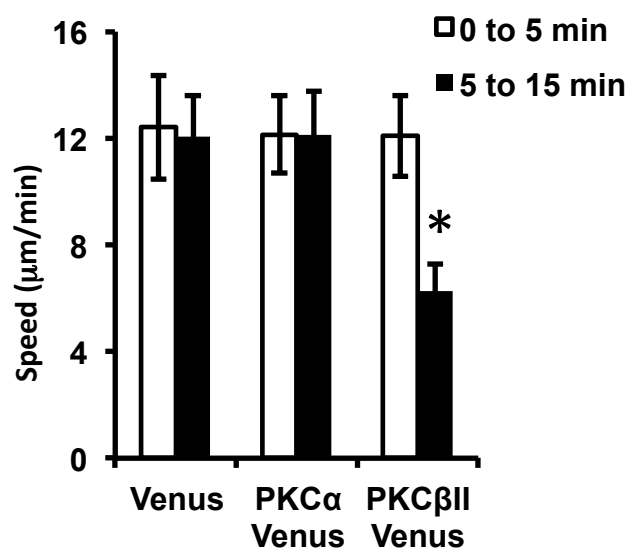

# Figure S3

A.

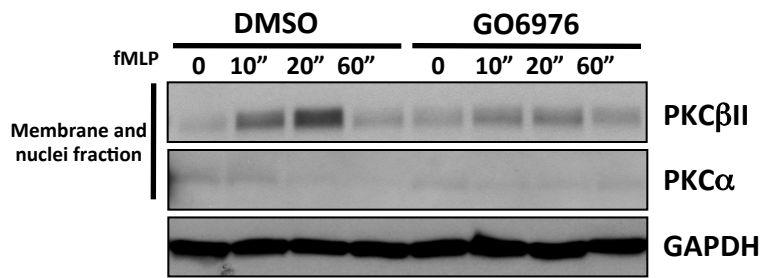

B.

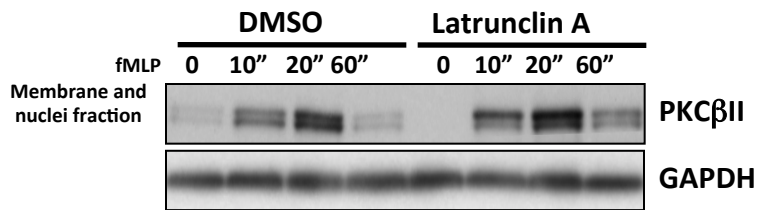

C.

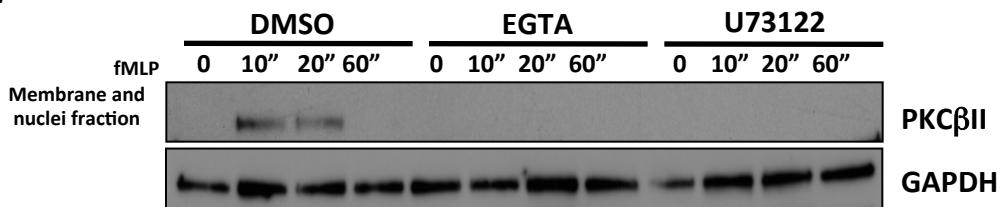

D.

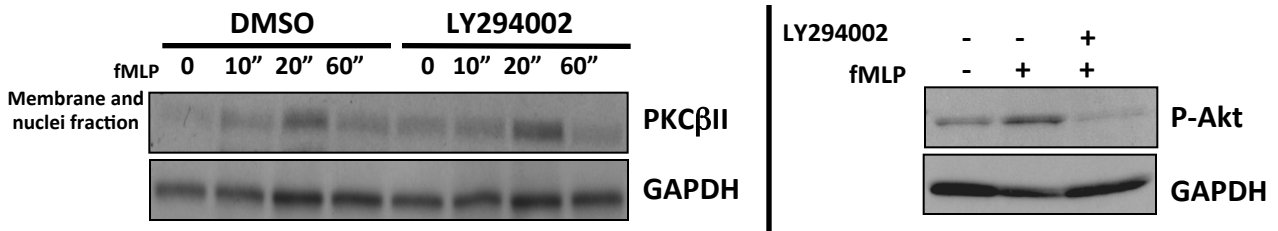

E.

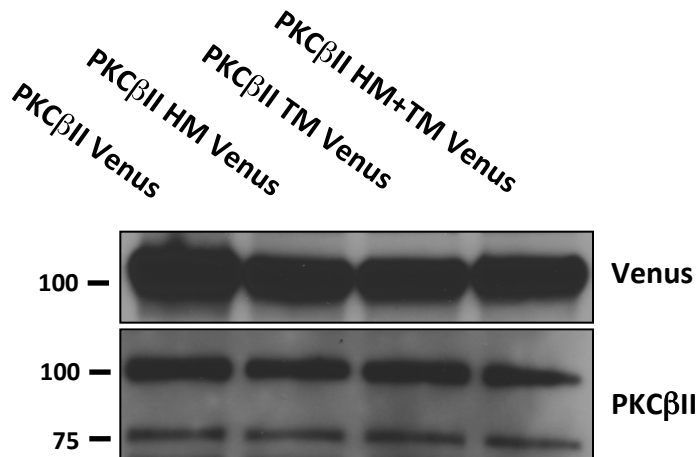



**Figure S4**

**A.**

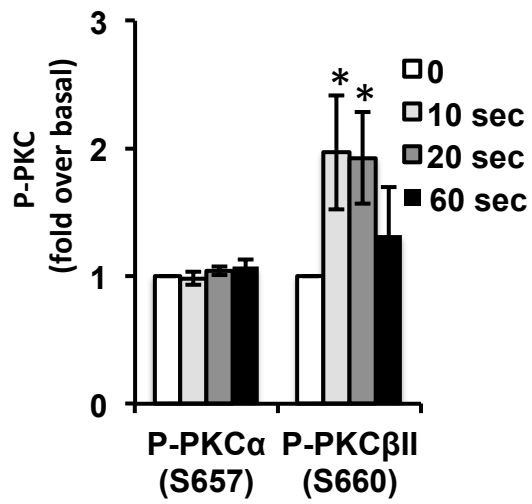

**B.**

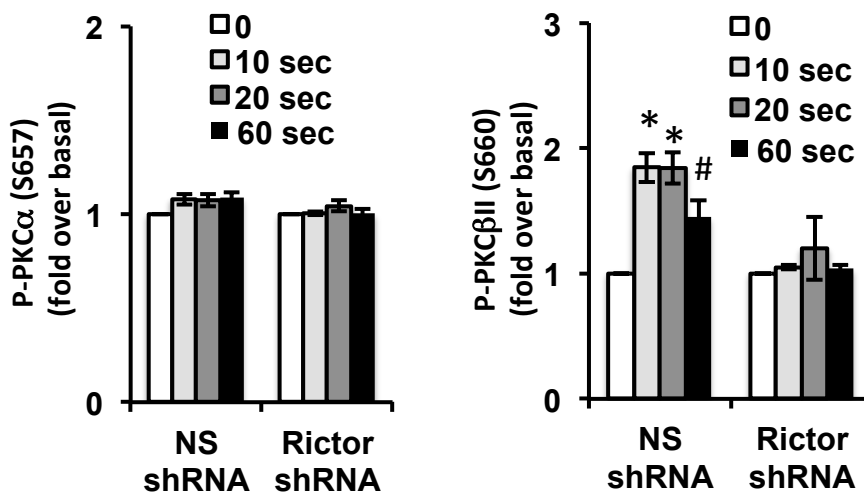

**C.**

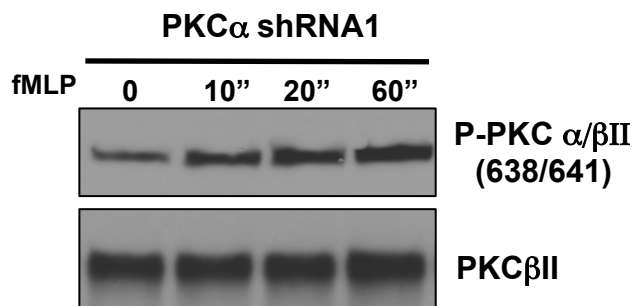

Supplement: supp_E14-01-0037v1_CombinedSupMats.pdf [file supp_E14-01-0037v1_CombinedSupMats.pdf]
